# Supplementary material
Source: PubMed Central journal article supplement (PMC4893792)

This work reports how and why solution pH alters cocrystal solubility and stability relative to drug.

$$S_{\text{cocrystal}} = [R] + [RH^+] = [HA] + [A^-]$$

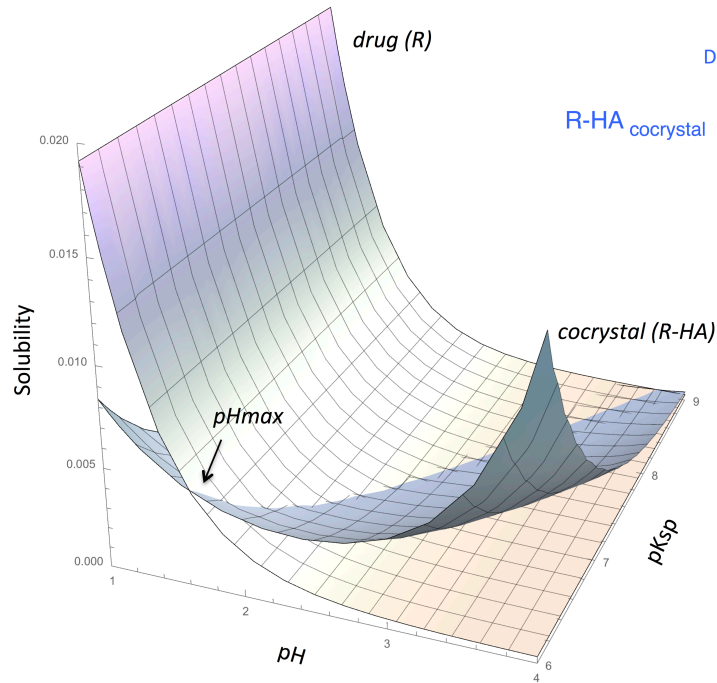

DISSOCIATION

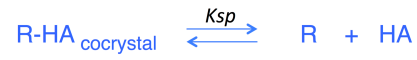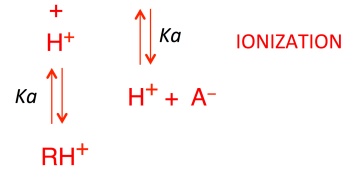

Supplement: NIHMS775262-supplement-Graphical_Abstract.pdf [file NIHMS775262-supplement-Graphical_Abstract.pdf]
